# Supplementary material for: Multielemental Analysis of Bee Pollen, Propolis, and Royal Jelly Collected in West-Central Poland
Source: MDPI journal article supplement (doi:10.3390/molecules26092415), 2021-04-21
Supplement: s1 [file s1]

# Multielemental analysis of bee pollen, propolis and royal jelly collected in west-central Poland

Eliza Matuszewska<sup>1</sup>, Agnieszka Klupeczynska<sup>1</sup>, Krzysztof Maciolek<sup>2</sup>, Zenon J. Kokot<sup>3</sup> and Jan Matysiak<sup>1,\*</sup>

<sup>1</sup>Department of Inorganic and Analytical Chemistry, Poznan University of Medical Sciences, Grunwaldzka 6 Street, 60-780 Poznań, Poland;

<sup>2</sup>Aquanet Laboratory Ltd., 126 Dolna Wilda Street, 61-492 Poznań, Poland;

<sup>3</sup>Faculty of Health Sciences, Calisia University - Kalisz, Poland, Kaszubska 13 Street, 62-800 Kalisz, Poland;

\*Correspondence: jmatysiak@ump.edu.pl

## Supplementary Materials

### Content:

**Table S1.** Levels (mean±SD) of the selected chemical elements in bee pollen compared to the available literature data.

**Table S2.** Levels (mean±SD) of the selected chemical elements in propolis compared to the available literature data.

**Table S3.** Performance characteristics of the analytical method used.

**Figure S1.** Bar chart visualizing Ca levels (mean±SD) measured in bee pollen in our study and by other researchers [42-44].

**Figure S2.** Bar chart visualizing Cu levels (mean±SD) measured in bee pollen in our study and by other researchers [39,40,42-44].

**Figure S3.** Bar chart visualizing Cr levels (mean±SD) measured in bee pollen in our study and by other researchers [39,40,42].

**Figure S4.** Bar chart visualizing Fe levels (mean±SD) measured in bee pollen in our study and by other researchers [39-44].

**Figure S5.** Bar chart visualizing K levels (mean±SD) measured in bee pollen in our study and by other researchers [42-44].

**Figure S6** Bar chart visualizing Mg levels (mean±SD) measured in bee pollen in our study and by other researchers [41-44].

**Figure S7.** Bar chart visualizing Mn levels (mean±SD) measured in bee pollen in our study and by other researchers [39,40,42-44].

**Figure S8.** Bar chart visualizing Na levels (mean±SD) measured in bee pollen in our study and by other researchers [42-44].

**Figure S9.** Bar chart visualizing Ni levels (mean±SD) measured in bee pollen in our study and by other researchers [39-42].

**Figure S10.** Bar chart visualizing Pb levels (mean±SD) measured in bee pollen in our study and by other researchers [39-41].

**Figure S11.** Bar chart visualizing Zn levels (mean±SD) measured in bee pollen in our study and by other researchers [39-43].

**Figure S12.** Bar chart visualizing As levels (mean±SD) measured in propolis in our study and by other researchers [45,47,48].

**Figure S13.** Bar chart visualizing Cr levels (mean±SD) measured in propolis in our study and by other researchers [46,48,49].

**Figure S14.** Bar chart visualizing Cu levels (mean±SD) measured in propolis in our study and by other researchers [45,47-49].

**Figure S15.** Bar chart visualizing K levels (mean±SD) measured in propolis in our study and by other researchers [46-48].

**Figure S16.** Bar chart visualizing Mg levels (mean±SD) measured in propolis in our study and by other researchers [41,46,48].

**Figure S17.** Bar chart visualizing Pb levels (mean±SD) measured in propolis in our study and by other researchers [41,45-49].

**Figure S17.** Bar chart visualizing Zn levels (mean±SD) measured in propolis in our study and by other researchers [41,45,46,48,49].

**Table S1.** Levels (mean±SD) of the selected chemical elements in bee pollen compared to the available literature data.

| Element | Matuszewska et al. (2021)<br>- current study | Temizer et al.<br>(2018) [39] | Altunatmaz et al.<br>(2017) [40] | Formicki et al.<br>(2013) [41] | Kostić et al.<br>(2015) [42] | Somerville and Nikol<br>(2002) [43] | Liolios et al.<br>(2019) [44] |
|---------|----------------------------------------------|-------------------------------|----------------------------------|--------------------------------|------------------------------|-------------------------------------|-------------------------------|
| Al      | 26.13±20.99                                  | 57.79±38.63                   | -                                | -                              | 35.87±13.01                  | -                                   | -                             |
| As      | 0.03±0.01                                    | 7.03±1.07                     | 0.39±0.43                        | -                              | -                            | -                                   | -                             |
| Ba      | 0.64±0.26                                    | -                             | -                                | -                              | 1.17±0.94                    | -                                   | -                             |
| Ca      | 1,238.33±539.27                              | -                             | -                                | -                              | 1,448.09±124.81              | 1146.4±454.51                       | 2,180.00±1,156.00             |
| Cd      | 0.06±0.05                                    | -                             | 0.07±0.04                        | 50.83±21.46                    | 0.07±0.03                    | -                                   | -                             |
| Co      | 0.038±0.012                                  | -                             | -                                | -                              | 0.037±0.01                   | -                                   | -                             |
| Cr      | 0.07±0.04                                    | 0.37±0.13                     | 0.79±0.37                        | -                              | 0.23±0.03                    | -                                   | -                             |
| Cu      | 4.75±1.23                                    | 4.95±2.09                     | 10.42±3.05                       | -                              | 7.89±0.66                    | 12.4±10.24                          | 10.00±4.00                    |
| Fe      | 49.17±22.16                                  | 71.84±33.16                   | 203.17±184.21                    | 1.23±0.22                      | 68.09±8.54                   | 67.16±72.13                         | 109.00±46.00                  |
| K       | 4,233.33±398.33                              | -                             | -                                | -                              | 3,482.40±274.26              | 5530±4,881.34                       | 5,899.00±2,031.00             |
| Mg      | 823.33±235.09                                | -                             | -                                | 1,946.25±44                    | 780.76±95.55                 | 716±394.47                          | 962.00±388.00                 |
| Mn      | 25.00±18.44                                  | 19.59±9.74                    | 29.33±41.56                      | -                              | 24.15±12.50                  | 32.68±25.15                         | 38.00±34.00                   |
| Mo      | 0.23±0.07                                    | 0.22±0.25                     | -                                | -                              | -                            | -                                   | -                             |
| Na      | 25.17±6.65                                   | -                             | -                                | -                              | 23.16±4.47                   | 82.02±84.96                         | 300.00±139.00                 |
| Ni      | 0.65±0.15                                    | 0.65±0.34                     | 0.51±0.57                        | 5.71±1.78                      | 0.75±0.30                    | -                                   | -                             |
| P       | 4,050.00±582.24                              | -                             | -                                | -                              | -                            | 4600±1,672.47                       | 4,325.00±2,053.00             |
| Pb      | 0.15±0.05                                    | 0.34±0.33                     | 0.13±0.13                        | 1.67±0.40                      | -                            | -                                   | -                             |
| S       | 2,383.33±416.73                              | -                             | -                                | -                              | -                            | 2378±692.91                         | -                             |
| Se      | 0.05±0.03                                    | -                             | 2.56±0.99                        | -                              | -                            | -                                   | -                             |
| Si      | 40.25±28.02                                  | -                             | 3.22±3.76                        | -                              | -                            | -                                   | -                             |
| Zn      | 31.33±5.75                                   | 17.78±5.18                    | 29.15±6.60                       | 108.66±24.84                   | 41.06±5.55                   | 58.28±47.23                         | -                             |

**Table S2.** Levels (mean±SD) of the selected chemical elements in propolis compared to the available literature data.

| Element | Matuszewska et al. (2021)<br>- current study | Formicki et al.<br>(2013) [41] | Roman et al.<br>(2011) [45] | Finger<br>et al. (2014) [46] | Hodel<br>et al. (2020) [47] | Bonvehí<br>and Bermejo (2012) [48] | Popov<br>et al. (2017) [49] |
|---------|----------------------------------------------|--------------------------------|-----------------------------|------------------------------|-----------------------------|------------------------------------|-----------------------------|
| Ag      | 0.12±0.10                                    | -                              | -                           | -                            | -                           | 0.058±0.007                        | -                           |
| Al      | 26.13±20.99                                  | -                              | -                           | 680.00±610.00                | -                           | 460.00±62.20                       | -                           |
| As      | 0.03±0.01                                    | -                              | 0.657±0.38                  | -                            | 2.736±3.79                  | 0.09±0.02                          | -                           |
| Ca      | 1,238.33±539.27                              | -                              | -                           | 1,660.00±1070.00             | -                           | 3,443.00±1,672.00                  | -                           |
| Cd      | 0.06±0.05                                    | 28.24±15.84                    | 0.19±0.18                   | 0.13±0.17                    | 0.03*                       | 0.07±0.02                          | 0.02±0.01                   |
| Co      | 0.038±0.012                                  | -                              | -                           | -                            | -                           | 0.29±0.26                          | -                           |
| Cr      | 0.07±0.04                                    | -                              | -                           | 5.53±3.53                    | -                           | 1.42±0.72                          | 0.03±0.013                  |
| Cu      | 4.75±1.23                                    | -                              | 6.95±4.05                   | -                            | 4.15±2.85                   | 3.45±0.68                          | 0.023±0.005                 |
| Fe      | 49.17±22.16                                  | 0.55±0.26                      | -                           | -                            | -                           | 572.00±303.00                      | -                           |
| K       | 4,233.33±398.33                              | -                              | -                           | 7,590.00±870.00              | 1,774.21±1,996.38           | 2,227.00±779.00                    | -                           |
| Mg      | 823.33±235.09                                | 362.13±202.53                  | -                           | 1,270.00±640.00              | -                           | 814.00±318.00                      | -                           |
| Mn      | 25.00±18.44                                  | -                              | -                           | 80.00±60.00                  | -                           | 15.30±7.16                         | -                           |
| Na      | 25.17±6.65                                   | -                              | -                           | 580.00±400.00                | -                           | 159.00±32.60                       | -                           |
| Ni      | 0.65±0.15                                    | 4.92±2.60                      | -                           | -                            | -                           | 1.99±1.07                          | -                           |
| P       | 4,050.00±582.24                              | -                              | -                           | -                            | -                           | 404.00±157.00                      | -                           |
| Pb      | 0.15±0.05                                    | 1.68±0.75                      | 5.74±4.49                   | 9.85±24.45                   | 0.30±0.25                   | 1.47±1.12                          | 0.04±0.005                  |
| S       | 2,383.33±416.73                              | -                              | -                           | -                            | -                           | 671.00±236.00                      | -                           |
| Se      | 0.05±0.03                                    | -                              | -                           | -                            | 0.33±0.10                   | 0.08±0.01                          | -                           |
| Si      | 40.25±28.02                                  | -                              | -                           | -                            | -                           | 694.00±104.00                      | -                           |
| Zn      | 31.33±5.75                                   | 39.84±19.02                    | 48.08±22.43                 | 20.00±10.00                  | -                           | 779.00±376.00                      | 0.03±0.006                  |

\* result from only one sample

**Table S3.** Performance characteristics of the analytical method used.

| Analyte   | Working range of the method         | Detection limit            | Quantification limit       | Precision determined using unfortified samples (%RSD) | Precision determined using fortified samples (%RSD) | Recovery (%) |
|-----------|-------------------------------------|----------------------------|----------------------------|-------------------------------------------------------|-----------------------------------------------------|--------------|
| <b>Ag</b> | 0.20 – 40 µg/l<br>0.020 – 4.0 mg/kg | 0.047 µg/l<br>0.0047 mg/kg | 0.16 µg/l<br>0.016 mg/kg   | ND                                                    | 3.4                                                 | 102-105      |
| <b>Al</b> | 1.0 – 200 µg/l<br>0.10 – 20 mg/kg   | 0.055 µg/l<br>0.006 mg/kg  | 0.18 µg/l<br>0.018 mg/kg   | 17                                                    | 1.5                                                 | 83-112       |
| <b>As</b> | 0.20 – 40 µg/l<br>0.020 – 4.0 mg/kg | 0.085 µg/l<br>0.0085 mg/kg | 0.29 µg/l<br>0.028 mg/kg   | 26                                                    | 5.2                                                 | 103-118      |
| <b>Ba</b> | 2.0 – 400 µg/l<br>0.20 – 40 mg/kg   | 0.84 µg/l<br>0.084 mg/kg   | 2.8 µg/l<br>0.28 mg/kg     | 39                                                    | 2.5                                                 | 101-110      |
| <b>Cd</b> | 0.10 – 20 µg/l<br>0.010 – 2.0 mg/kg | 0.020 µg/l<br>0.002 mg/kg  | 0.070 µg/l<br>0.007 mg/kg  | 12                                                    | 9.7                                                 | 102-109      |
| <b>Co</b> | 0.10 – 20 µg/l<br>0.010 – 2.0 mg/kg | 0.015 µg/l<br>0.0015 mg/kg | 0.049 µg/l<br>0.0049 mg/kg | 32                                                    | 4.1                                                 | 103-112      |
| <b>Cr</b> | 0.20 – 40 µg/l<br>0.020 – 4.0 mg/kg | 0.031 µg/l<br>0.003 mg/kg  | 0.10 µg/l<br>0.01 mg/kg    | 24                                                    | 2.4                                                 | 106-113      |
| <b>Cu</b> | 1.0 – 200 µg/l<br>0.10 – 20 mg/kg   | 0.078 µg/l<br>0.0078 mg/kg | 0.26 µg/l<br>0.026 mg/kg   | 22                                                    | 2.5                                                 | 102-113      |
| <b>Mn</b> | 2.0 – 400 µg/l<br>0.20 – 40 mg/kg   | 0.40 µg/l<br>0.04 mg/kg    | 1.3 µg/l<br>0.13 mg/kg     | 19                                                    | 5.5                                                 | 94-108       |
| <b>Ni</b> | 0.20 – 40 µg/l<br>0.020 – 4.0 mg/kg | 0.083 µg/l<br>0.0083 mg/kg | 0.28 µg/l<br>0.028 mg/kg   | 23                                                    | 4.6                                                 | 102-109      |
| <b>Pb</b> | 0.20 – 40 µg/l<br>0.020 – 4.0 mg/kg | 0.010 µg/l<br>0.001 mg/kg  | 0.030 µg/l<br>0.003 mg/kg  | 25                                                    | 1.0                                                 | 100-104      |
| <b>Se</b> | 0.20 – 40 µg/l<br>0.020 – 4.0 mg/kg | 0.17 µg/l<br>0.017 mg/kg   | 0.56 µg/l<br>0.056 mg/kg   | ND                                                    | 12                                                  | 106-138      |
| <b>V</b>  | 0.20 – 40 µg/l<br>0.020 – 4.0 mg/kg | 0.050 µg/l<br>0.005 mg/kg  | 0.17 µg/l<br>0.017 mg/kg   | 22                                                    | 5.2                                                 | 104-111      |
| <b>Zn</b> | 1.0 – 200 µg/l<br>0.10 – 20 mg/kg   | 0.54 µg/l<br>0.054 mg/kg   | 1.8 µg/l<br>0.18 mg/kg     | 38                                                    | 2.3                                                 | 77-162       |

<QL – below quantification limit

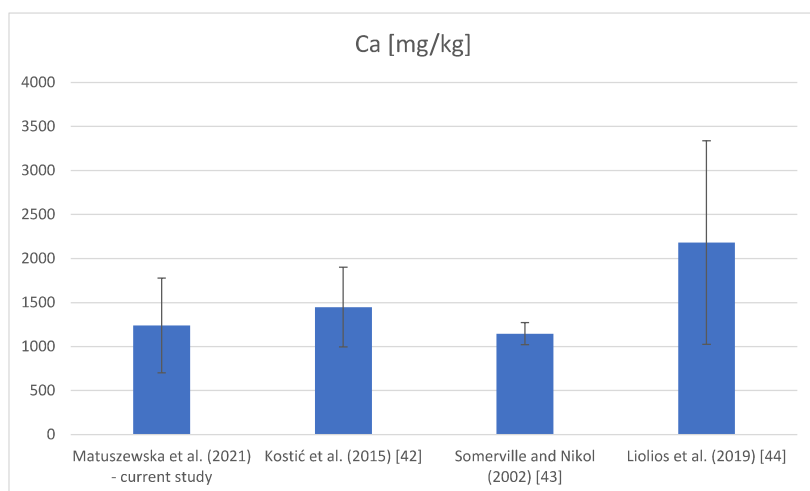

**Figure S1.** Bar chart visualizing Ca levels (mean±SD) measured in bee pollen in our study and by other researchers [42-44].

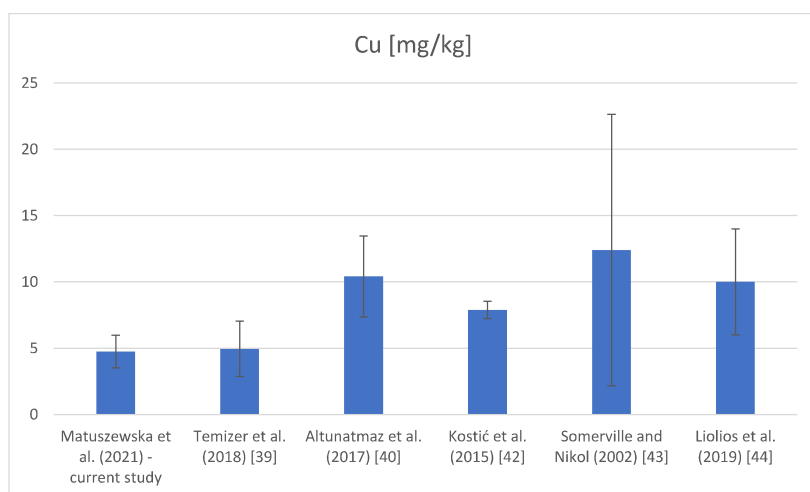

**Figure S2.** Bar chart visualizing Cu levels (mean±SD) measured in bee pollen in our study and by other researchers [39,40,42-44].

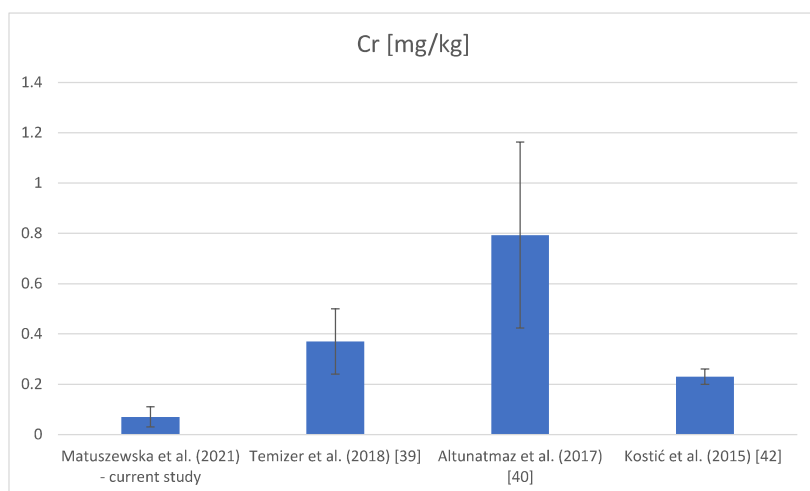

**Figure S3.** Bar chart visualizing Cr levels (mean±SD) measured in bee pollen in our study and by other researchers [39,40,42].

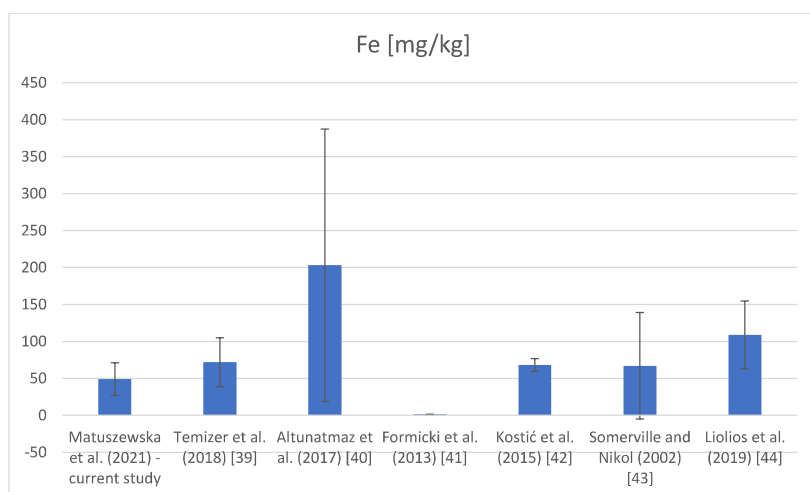

**Figure S4.** Bar chart visualizing Fe levels (mean±SD) measured in bee pollen in our study and by other researchers [39-44].

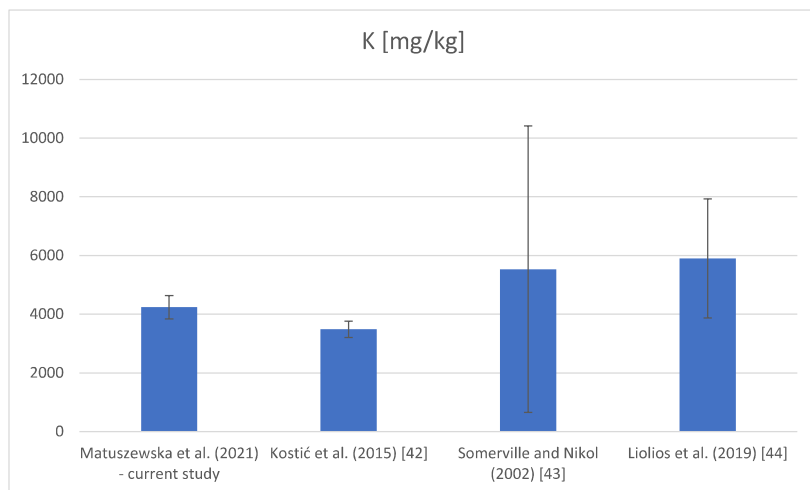

**Figure S5.** Bar chart visualizing K levels (mean±SD) measured in bee pollen in our study and by other researchers [42-44].

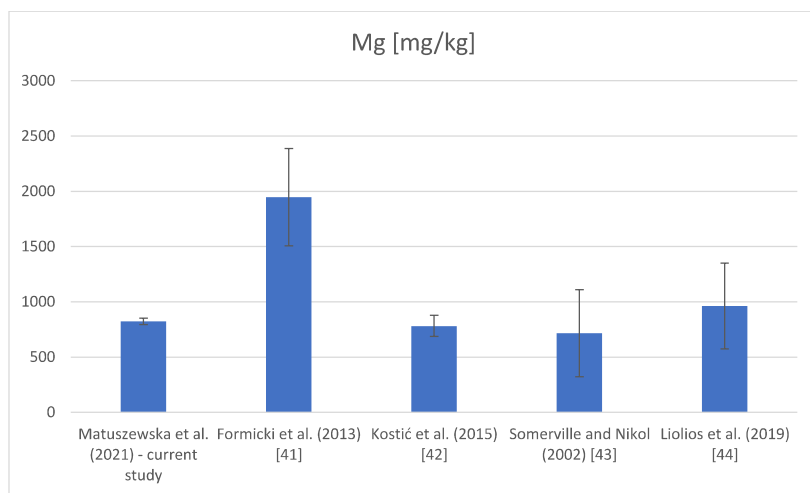

**Figure S6** Bar chart visualizing Mg levels (mean±SD) measured in bee pollen in our study and by other researchers [41-44].



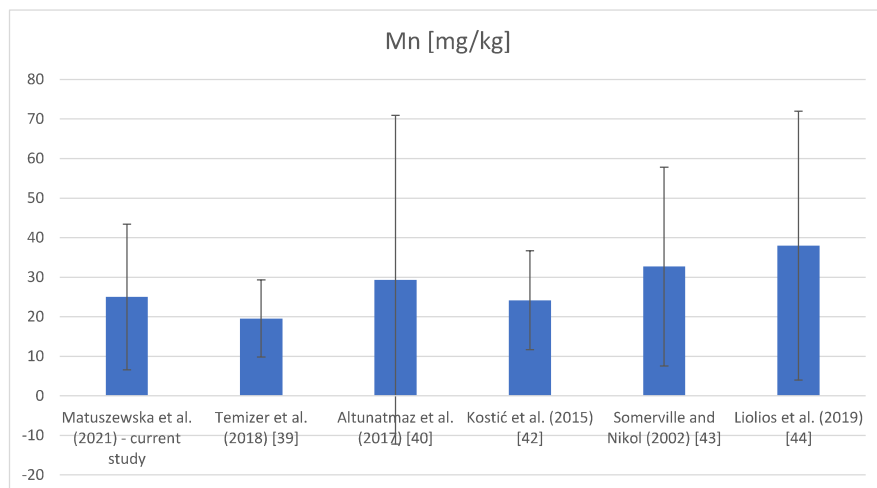

**Figure S7.** Bar chart visualizing Mn levels (mean±SD) measured in bee pollen in our study and by other researchers [39,40,42-44].

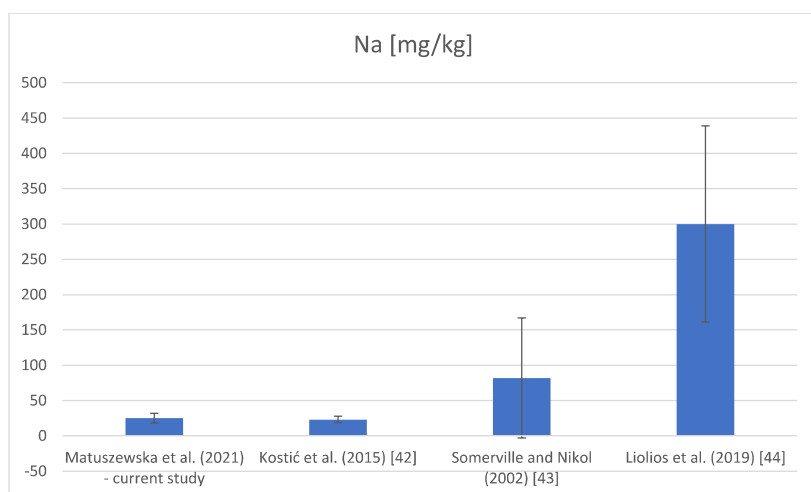

**Figure S8.** Bar chart visualizing Na levels (mean±SD) measured in bee pollen in our study and by other researchers [42-44].

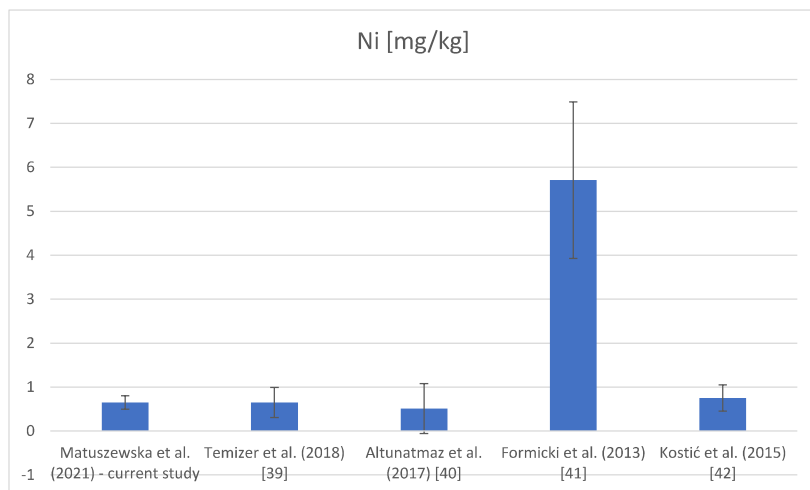

**Figure S9.** Bar chart visualizing Ni levels (mean±SD) measured in bee pollen in our study and by other researchers [39-42].

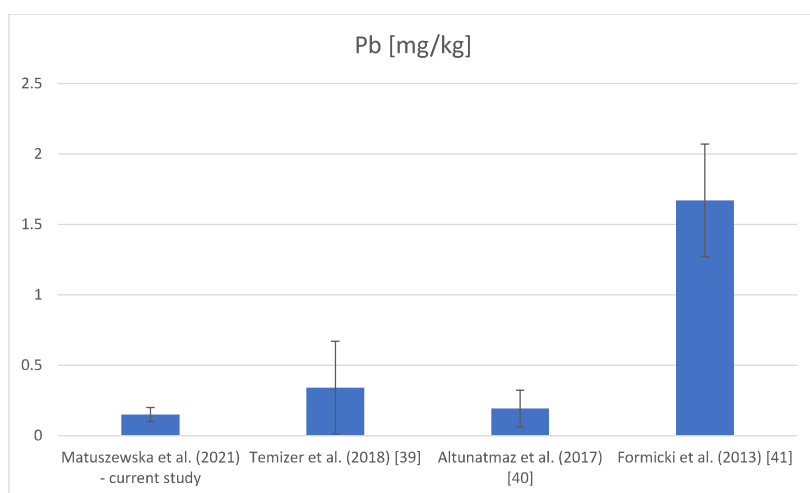

**Figure S10.** Bar chart visualizing Pb levels (mean±SD) measured in bee pollen in our study and by other researchers [39-41].

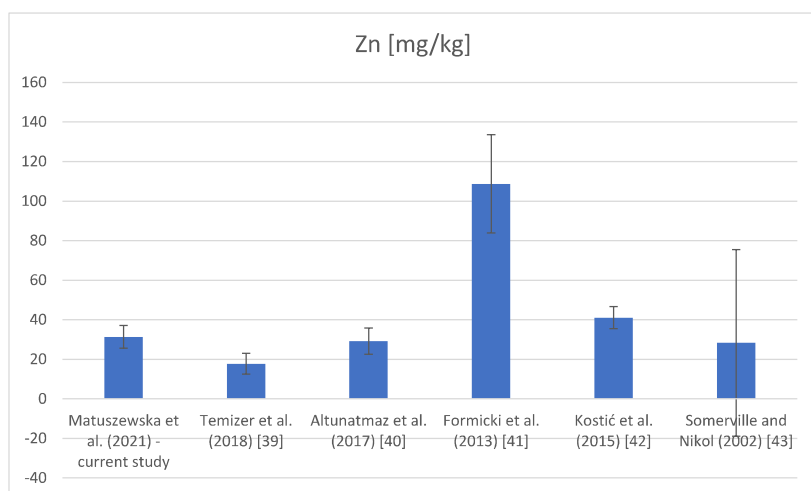

**Figure S11.** Bar chart visualizing Zn levels (mean±SD) measured in bee pollen in our study and by other researchers [39-43].

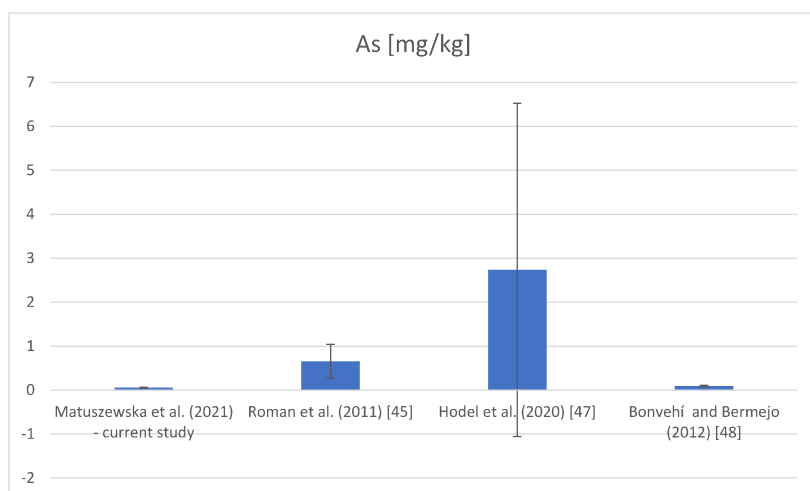

**Figure S12.** Bar chart visualizing As levels (mean±SD) measured in propolis in our study and by other researchers [45,47,48].

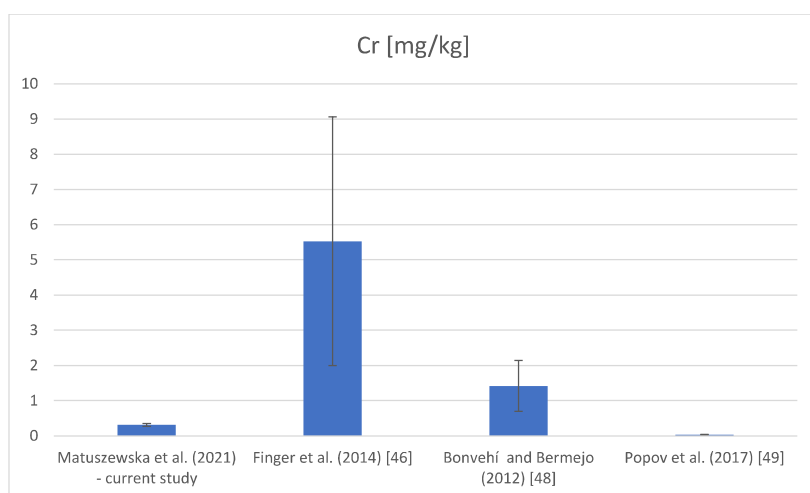

**Figure S13.** Bar chart visualizing Cr levels (mean±SD) measured in propolis in our study and by other researchers [46,48,49].

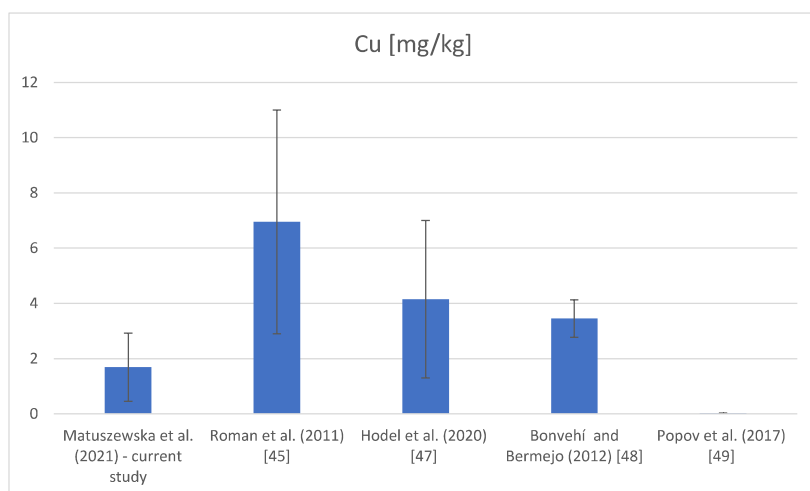

**Figure S14.** Bar chart visualizing Cu levels (mean±SD) measured in propolis in our study and by other researchers [45,47-49].

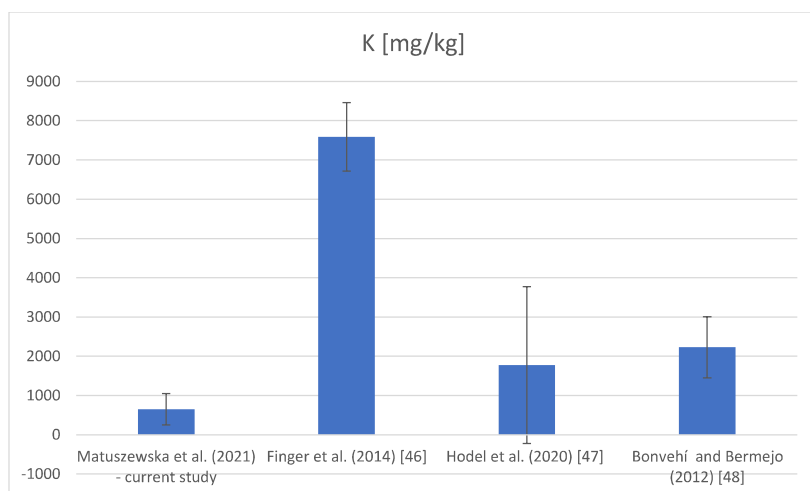

**Figure S15.** Bar chart visualizing K levels (mean±SD) measured in propolis in our study and by other researchers [46-48].

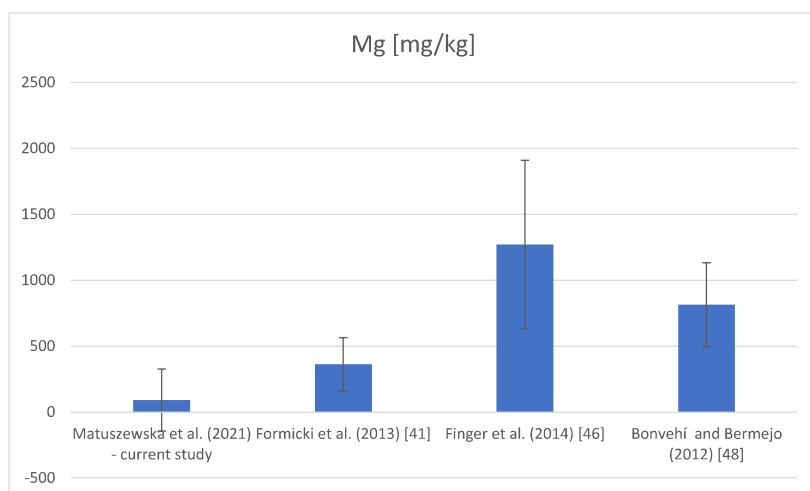

**Figure S16.** Bar chart visualizing Mg levels (mean±SD) measured in propolis in our study and by other researchers [41,46,48].

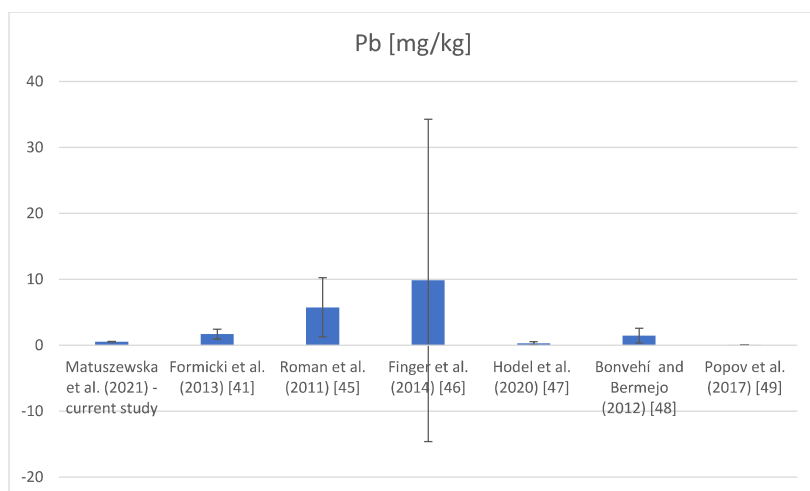

**Figure S17.** Bar chart visualizing Pb levels (mean±SD) measured in propolis in our study and by other researchers [41,45-49].

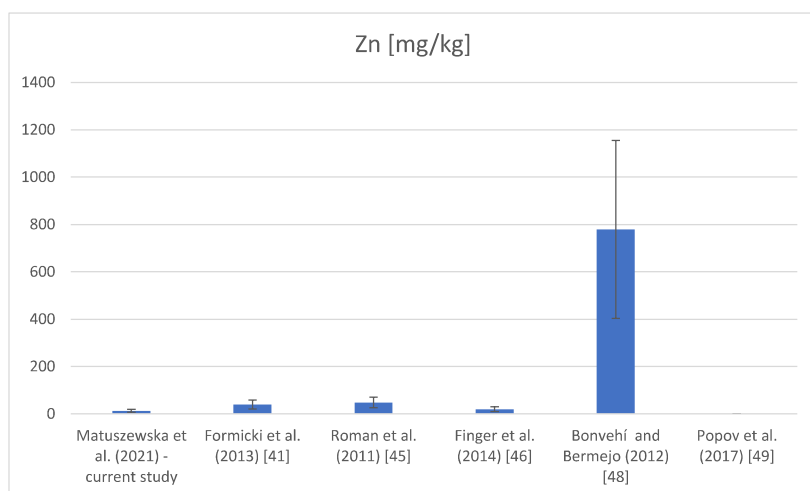

**Figure S17.** Bar chart visualizing Zn levels (mean±SD) measured in propolis in our study and by other researchers [41,45,46,48,49].

## References:

39. Temizer İK, Güder A, Temel FA, AVCI E. A comparison of the antioxidant activities and biomonitoring of heavy metals by pollen in the urban environments. *Environ Monit Assess* **2018**;190(8):462.
40. Altunalmaz SS, Tarhan D, Aksu F, Barutçu UB, Or ME. Mineral element and heavy metal (Cadmium, lead and arsenic) levels of bee pollen in Turkey. *Food Sci Technol* **2017**;37:136–41.
41. Formicki, Grzegorz; Greń, Agnieszka; Stawarz, Robert; Zyśk, Bartłomiej; Gał A. Metal Content in Honey, Propolis, Wax, and Bee Pollen and Implications for Metal Pollution Monitoring. *Polish J Environ Stud* **2013**;22(1):99–106.
42. Kostić AZ, Pešić MB, Mosić MD, Dojčinović BP, Natić MM, Trifković JD. Mineral content of bee pollen from Serbia. *Arh Hig Rada Toksikol* **2015**;66(4):251–8.
43. Somerville DC, Nicol HI. Mineral content of honeybee-collected pollen from southern New South Wales. *Aust J Exp Agric* **2002**;42(8):1131–6. <https://doi.org/10.1071/EA01086>
44. Liolios V, Tananaki C, Papaioannou A, Kanelis D, Rodopoulou MA, Argena N. Mineral content in monofloral bee pollen: investigation of the effect of the botanical and geographical origin. *J Food Meas Charact* **2019**;13(3):1674–82. <http://dx.doi.org/10.1007/s11694-019-00084-w>
45. Roman A, Madras-Majewska B, Popiela-Pleban E. Comparative study of selected toxic elements in propolis and honey. *J Apic Sci* **2011**;55(2):97–106.
46. Finger D, Filho IK, Torres YR, Quináia SP. Propolis as an indicator of environmental contamination by metals. *Bull Environ Contam Toxicol* **2014**;92(3):259–64.
47. Hodel KVS, Machado BAS, Santos NR, Costa RG, Menezes-Filho JA, Umsza-Guez MA. Metal Content of Nutritional and Toxic Value in Different Types of Brazilian Propolis. von Muhlen C, editor. *Sci World J* **2020**;2020:4395496.
48. Bonvehí JS, Bermejo FJO. Element content of propolis collected from different areas of South Spain. *Environ Monit Assess* **2013**;185(7):6035–47. <https://doi.org/10.1007/s10661-012-3004-3>
49. Popov BB, Hristova VK, Presilski S, Shariati MA, Najman S. Assessment of heavy metals in propolis and soil from the Pelagonia region, republic of Macedonia. *Maced J Chem Chem Eng* **2017**;36(1):1–11.
